# Supplementary material for: Photovoltaic Cell and Module I-V Characteristic Approximation Using B&eacute;zier Curves
Source: Preprints.org preprint supplement (doi:10.20944/preprints201802.0014.v2), 2018-03-23
Supplement: Supplementary file 1 [file Bezier curves for 18 PV devices.xlsx]

## Sheet: 18 + 1 Plots
0		AliBaba Cell
1		Shell SP-70
2		Isofoton I150 InDach
3		Bosch M245 3BB
4		MSP300AS-36.EU
5		Kyocera KG200GT
6		Kyocera KC85T
7		Kyocera KD135SX_UPU
8		Kyocera KD245
9		Sharp_ND_224uC1
10		Shell S36
11		BP Solar MSX-60
12		BP Solar MSX-60 Single Cell
13		Amerisolar AS-6P 300 W
14		Shell ST40
15		Sanyo HIT-240 HDE4
16		Onyx 1200x600 ref10
17		Onyx 1200x600 ref30
18		6.5Wp L Cell
